# Supplementary material for: Optimization of Rhodococcus erythropolis JCM3201T Nutrient Media to Improve Biomass, Lipid, and Carotenoid Yield Using Response Surface Methodology
Source: MDPI journal article supplement (doi:10.3390/microorganisms11092147), 2023-08-24
Supplement: s1 [file s1]

# Optimization of *Rhodococcus erythropolis* JCM3201<sup>T</sup> nutrient media to improve biomass, lipid, and carotenoid yield using response surface methodology

## Supplementary Materials

**Table S1:** Cell growth of *R. erythropolis* measured as OD at 600 nm over 192 h. Samples were cultured with variable nitrogen sources at elemental nitrogen concentration of 0.16 g L<sup>-1</sup> (C:N of 100, 16 g L<sup>-1</sup> carbon in the form of glucose), n = 3.

| [h]                           | 0       | 27          | 48          | 67          | 73          | 91          | 98          | 115         | 122         | 140         | 175          | 192          |
|-------------------------------|---------|-------------|-------------|-------------|-------------|-------------|-------------|-------------|-------------|-------------|--------------|--------------|
| Ammonium chloride             | 0.2 ± 0 | 0.46 ± 0.01 | 0.79 ± 0.04 | 1.39 ± 0.07 | 1.42 ± 0.07 | 1.79 ± 0.12 | 2.06 ± 0.11 | 2.46 ± 0.14 | 2.45 ± 0.11 | 2.7 ± 0.09  | 3.65 ± 1.03  | 3.82 ± 0.08  |
| Diammonium Hydrogen phosphate | 0.2 ± 0 | 0.48 ± 0.02 | 0.83 ± 0.05 | 1.5 ± 0.09  | 1.53 ± 0.04 | 2.06 ± 0.11 | 2.18 ± 0.09 | 2.74 ± 0.04 | 2.75 ± 0.18 | 3.28 ± 0.43 | 4.26 ± 0.94  | 5.72 ± 0.83  |
| Ammonium sulfate              | 0.2 ± 0 | 0.48 ± 0.02 | 0.86 ± 0.02 | 1.54 ± 0.15 | 1.59 ± 0.09 | 2.06 ± 0.07 | 2.24 ± 0.18 | 2.67 ± 0.07 | 2.77 ± 0.09 | 3.07 ± 0.22 | 4.16 ± 0.15  | 5.77 ± 0.78  |
| Potassium nitrate             | 0.2 ± 0 | 0.42 ± 0.02 | 0.65 ± 0.03 | 0.81 ± 0.07 | 0.86 ± 0.05 | 1.16 ± 0.02 | 1.17 ± 0.06 | 1.25 ± 0.02 | 1.25 ± 0.05 | 1.35 ± 0.13 | 2.01 ± 0.11  | 1.93 ± 0.38  |
| Ammonium nitrate              | 0.2 ± 0 | 0.48 ± 0.01 | 0.84 ± 0.04 | 1.48 ± 0.05 | 1.51 ± 0.18 | 1.98 ± 0.06 | 2.03 ± 0.08 | 2.55 ± 0.04 | 2.63 ± 0.11 | 3.42 ± 0.22 | 5.07 ± 0.19  | 5.76 ± 0.1   |
| Yeast extract                 | 0.2 ± 0 | 2.08 ± 0.08 | 3.55 ± 0.02 | 5.55 ± 0.11 | 6.3 ± 0.05  | 7.33 ± 0.28 | 7.66 ± 0.34 | 9.11 ± 0.19 | 8.64 ± 0.37 | 8.43 ± 0.22 | 9.47 ± 0.69  | 7.76 ± 0.49  |
| Tryptone/Peptone              | 0.2 ± 0 | 1.66 ± 0.01 | 2.75 ± 0.08 | 4.69 ± 0.16 | 5.18 ± 0.09 | 6.36 ± 0.01 | 7.08 ± 0.19 | 7.5 ± 0.51  | 7.55 ± 0.02 | 7.72 ± 0.09 | 8.87 ± 0.59  | 7.96 ± 0.28  |
| Urea                          | 0.2 ± 0 | 0.49 ± 0.08 | 0.89 ± 0.09 | 1.43 ± 0.29 | 1.52 ± 0.31 | 2.28 ± 0.33 | 2.24 ± 0.41 | 2.76 ± 0.5  | 2.81 ± 0.57 | 3.57 ± 0.5  | 6.58 ± 0.26  | 6.78 ± 0.09  |
| Ammonium acetate              | 0.2 ± 0 | 1.79 ± 0.03 | 2.9 ± 0.11  | 3.89 ± 0.22 | 4.64 ± 0.11 | 5.18 ± 0.29 | 5.83 ± 0.16 | 7.62 ± 0.13 | 7.46 ± 0.23 | 8.25 ± 0.26 | 10.52 ± 0.16 | 11.69 ± 0.37 |

**Table S2:** Biomass formation (DCW), lipid content (normalized to DCW) and Carotenoid accumulation (normalized to DCW) of *R. erythropolis* at 140 and 192 h. Samples were cultured with variable nitrogen sources at elemental nitrogen concentration of 0.16 g L<sup>-1</sup> (C:N of 100, 16 g L<sup>-1</sup> carbon in the form of glucose), n = 3.

|                               | Biomass (g L <sup>-1</sup> ) |             | Lipid content (mg g <sup>-1</sup> <sub>DCW</sub> ) |                | Carotenoid content (Abs <sub>454nm</sub> mg <sup>-1</sup> <sub>DCW</sub> ) |               |
|-------------------------------|------------------------------|-------------|----------------------------------------------------|----------------|----------------------------------------------------------------------------|---------------|
|                               | 140 h                        | 192 h       | 140 h                                              | 192 h          | 140 h                                                                      | 192 h         |
| Ammonium chloride             | 1.12 ± 0.11                  | 1.66 ± 0.08 | 35.76 ± 13.79                                      | 48.68 ± 11.83  | 0.021 ± 0.003                                                              | 0.015 ± 0.001 |
| Diammonium hydrogen phosphate | 0.99 ± 0.13                  | 2.15 ± 0.14 | 40.12 ± 6.04                                       | 55.23 ± 0.64   | 0.039 ± 0.006                                                              | 0.026 ± 0.006 |
| Ammonium sulfate              | 1 ± 0.17                     | 2.29 ± 0.08 | 44.76 ± 5.61                                       | 49.42 ± 0.21   | 0.035 ± 0.004                                                              | 0.022 ± 0.005 |
| Potassium nitrate             | 0.22 ± 0.12                  | 0.36 ± 0.08 | 105.09 ± 25.09                                     | 79.27 ± 8.31   | 0.019 ± 0.006                                                              | 0.008 ± 0.001 |
| Ammonium nitrate              | 1.27 ± 0.16                  | 1.72 ± 0.03 | 35.84 ± 3.09                                       | 49.62 ± 3.37   | 0.02 ± 0.004                                                               | 0.014 ± 0     |
| Yeast extract                 | 2.13 ± 0.07                  | 1.98 ± 0.08 | 103.85 ± 6.63                                      | 156.69 ± 22.99 | 0.026 ± 0.007                                                              | 0.021 ± 0.006 |
| Tryptone/Peptone              | 1.88 ± 0.03                  | 1.72 ± 0.18 | 96.76 ± 2.66                                       | 132.29 ± 15.37 | 0.024 ± 0.006                                                              | 0.021 ± 0.002 |
| Urea                          | 1.38 ± 0.19                  | 2.3 ± 0.16  | 37.75 ± 4.86                                       | 46.46 ± 7.72   | 0.029 ± 0.002                                                              | 0.015 ± 0.003 |
| Ammonium acetate              | 2.58 ± 0.05                  | 2.84 ± 0.02 | 51.13 ± 0.35                                       | 68.29 ± 4.98   | 0.021 ± 0.005                                                              | 0.014 ± 0.002 |

**Table S3:** Cell growth of *R. erythropolis* measured as OD at 600 nm over 192 h. Samples were cultured with variable carbon sources at elemental carbon concentration of 16 g L<sup>-1</sup> (C:N of 100, 0.16 g L<sup>-1</sup> nitrogen in the form of ammonium acetate), n = 3.

| [h]       | 0       | 18          | 24          | 41          | 48          | 67          | 94          | 111         | 121         | 140         | 164         | 192         |
|-----------|---------|-------------|-------------|-------------|-------------|-------------|-------------|-------------|-------------|-------------|-------------|-------------|
| Glucose   | 0.2 ± 0 | 0.96 ± 0.04 | 1.55 ± 0.18 | 2.47 ± 0.3  | 2.58 ± 0.33 | 3.21 ± 0.27 | 5.25 ± 0.29 | 6.25 ± 0.29 | 6.86 ± 0.32 | 8.22 ± 0.58 | 9.72 ± 0.56 | 9.81 ± 0.38 |
| Galactose | 0.2 ± 0 | 0.58 ± 0.1  | 0.84 ± 0.1  | 0.8 ± 0.2   | 0.66 ± 0.03 | 0.57 ± 0.1  | 0.8 ± 0.08  | 0.76 ± 0.09 | 0.75 ± 0.07 | 0.57 ± 0.11 | 0.88 ± 0.1  | 1.05 ± 0.17 |
| Fructose  | 0.2 ± 0 | 3.07 ± 0.29 | 3.91 ± 0.33 | 4.61 ± 0.1  | 4.63 ± 0.18 | 3.85 ± 0.66 | 4.12 ± 0.49 | 3.31 ± 0.18 | 3.61 ± 0.49 | 3.47 ± 0.5  | 3.84 ± 0.62 | 3.79 ± 0.32 |
| Lactose   | 0.2 ± 0 | 0.56 ± 0.07 | 0.63 ± 0.05 | 0.55 ± 0.04 | 0.59 ± 0.19 | 0.5 ± 0.08  | 0.66 ± 0.13 | 0.6 ± 0.09  | 0.64 ± 0.14 | 0.43 ± 0.06 | 0.63 ± 0.18 | 0.64 ± 0.13 |
| Sucrose   | 0.2 ± 0 | 0.78 ± 0.06 | 1.41 ± 0.04 | 3.28 ± 0.3  | 3.5 ± 0.17  | 5.57 ± 0.4  | 8.37 ± 0.1  | 8.28 ± 0.36 | 8.39 ± 0.24 | 9.26 ± 0.31 | 9.68 ± 0.34 | 8.2 ± 0.29  |
| Maltose   | 0.2 ± 0 | 0.79 ± 0.05 | 1.11 ± 0.13 | 1.45 ± 0.12 | 1.5 ± 0.34  | 1.25 ± 0.06 | 1.55 ± 0.11 | 1.42 ± 0.09 | 1.44 ± 0.06 | 1.48 ± 0.07 | 1.55 ± 0.09 | 1.4 ± 0.28  |
| Sorbitol  | 0.2 ± 0 | 1.6 ± 0.03  | 2.38 ± 0.22 | 2.84 ± 0.16 | 2.96 ± 0.39 | 4.02 ± 0.31 | 5.4 ± 0.4   | 5.25 ± 0.19 | 5.62 ± 0.41 | 5.95 ± 0.5  | 6.48 ± 0.61 | 5.84 ± 0.57 |
| Glycerol  | 0.2 ± 0 | 1.44 ± 0.04 | 1.94 ± 0.12 | 3.06 ± 0.19 | 3.28 ± 0.11 | 3.62 ± 0.36 | 4.56 ± 0.38 | 4.44 ± 0.41 | 4.56 ± 0.42 | 5.22 ± 0.18 | 5.31 ± 0.38 | 4.57 ± 0.05 |

**Table S4:** Biomass formation (DCW), lipid content (normalized to DCW) and Carotenoid accumulation (normalized to DCW) of *R. erythropolis* at 140 and 192 h. Samples were cultured with variable carbon sources at elemental carbon concentration of 16 g L<sup>-1</sup> (C:N of 100, 0.16 g L<sup>-1</sup> nitrogen in the form of ammonium acetate), n = 3. No carotenoid extraction was performed for galactose and lactose, due to a lack of sufficient biomass formation.

|           | Biomass (g L <sup>-1</sup> ) |             | Lipid content (mg g <sup>-1</sup> <sub>DCW</sub> ) |               | Carotenoid content (Abs <sub>454nm</sub> mg <sup>-1</sup> <sub>DCW</sub> ) |               |
|-----------|------------------------------|-------------|----------------------------------------------------|---------------|----------------------------------------------------------------------------|---------------|
|           | 140 h                        | 192 h       | 140 h                                              | 192 h         | 140 h                                                                      | 192 h         |
| Glucose   | 2.5 ± 0.13                   | 3.1 ± 0.14  | 54.87 ± 2.86                                       | 75.9 ± 7.27   | 0.013 ± 0.001                                                              | 0.015 ± 0.001 |
| Galactose | 0.24 ± 0.04                  | 0.27 ± 0.02 | 24.52 ± 0.37                                       | 19.77 ± 0.43  | -                                                                          | -             |
| Fructose  | 1.1 ± 0.12                   | 1.35 ± 0.13 | 75.63 ± 8.48                                       | 73.94 ± 2.64  | 0.025 ± 0.001                                                              | 0.021 ± 0.002 |
| Lactose   | 0.25 ± 0.03                  | 0.23 ± 0.04 | 38.5 ± 2.02                                        | 35.94 ± 5.11  | -                                                                          | -             |
| Sucrose   | 2.69 ± 0.32                  | 2.47 ± 0.22 | 52.63 ± 0.89                                       | 59.56 ± 0.9   | 0.017 ± 0.001                                                              | 0.018 ± 0.001 |
| Maltose   | 0.56 ± 0.08                  | 0.43 ± 0.03 | 32.19 ± 2.47                                       | 34.95 ± 3.2   | 0.031 ± 0.011                                                              | 0.027 ± 0.009 |
| Sorbitol  | 1.79 ± 0.04                  | 1.85 ± 0.14 | 81.84 ± 2.93                                       | 93.81 ± 4.11  | 0.018 ± 0                                                                  | 0.028 ± 0.008 |
| Glycerol  | 1.46 ± 0.21                  | 1.47 ± 0.06 | 65.49 ± 21.41                                      | 86.06 ± 13.43 | 0.028 ± 0.004                                                              | 0.02 ± 0.001  |

**Table S5:** Estimated onset of stationary phase in *R. erythropolis* cultures cultivated in different nitrogen and carbon sources. Samples were cultured with at carbon concentration of 16 g L<sup>-1</sup> and nitrogen concentration of 0.16 g L<sup>-1</sup>, n = 3. For different nitrogen sources, glucose was used as carbon source. For different carbon sources, ammonium acetate was used as nitrogen source.

| Nitrogen source               | Onset of stationary phase [h] | Carbon source | Onset of stationary phase [h] |
|-------------------------------|-------------------------------|---------------|-------------------------------|
| Ammonium chloride             | -                             | Glucose       | 164                           |
| Diammonium hydrogen phosphate | -                             | Galactose     | 24                            |
| Ammonium sulfate              | -                             | Fructose      | 48                            |
| Potassium nitrate             | 175                           | Lactose       | 24                            |
| Ammonium nitrate              | -                             | Sucrose       | 94                            |
| Yeast extract                 | 115                           | Maltose       | 48                            |
| Tryptone/Peptone              | 115                           | Sorbitol      | 94                            |
| Urea                          | -                             | Glycerol      | 94                            |
| Ammonium acetate              | -                             |               |                               |

**Table S6:** Fatty acid profiles of *R. erythropolis* at 140 and 192 h. Samples were cultured with variable nitrogen sources, n = 3. “Other” constitutes fatty acids with a representation below 3% of total fatty acid content (w/w), and include C14:1, C15:0, C17:0, 14-Methyl-C16:0, C18:2, C20:1, C20:3, C20:5, C22:1 among others.

| 140 h                |                   |                               |                  |                   |                  |               |                  |               |                  |
|----------------------|-------------------|-------------------------------|------------------|-------------------|------------------|---------------|------------------|---------------|------------------|
|                      | Ammonium chloride | Diammonium hydrogen phosphate | Ammonium sulfate | Potassium nitrate | Ammonium nitrate | Yeast extract | Tryptone/Peptone | Urea          | Ammonium acetate |
| <b>C14:0</b>         | 0.163 ± 0.01      | 0.16 ± 0.011                  | 0.161 ± 0.013    | 0.162 ± 0.017     | 0.156 ± 0.002    | 0.117 ± 0.003 | 0.117 ± 0.002    | 0.146 ± 0.007 | 0.123 ± 0.003    |
| <b>C16:0</b>         | 0.254 ± 0.003     | 0.247 ± 0.005                 | 0.253 ± 0.004    | 0.271 ± 0.01      | 0.266 ± 0.004    | 0.336 ± 0.001 | 0.337 ± 0.003    | 0.235 ± 0.004 | 0.304 ± 0.003    |
| <b>C16:1</b>         | 0.118 ± 0.003     | 0.12 ± 0.003                  | 0.118 ± 0.004    | 0.1 ± 0.009       | 0.107 ± 0.004    | 0.05 ± 0.001  | 0.054 ± 0.001    | 0.117 ± 0.003 | 0.067 ± 0.001    |
| <b>C17:1</b>         | 0.078 ± 0.004     | 0.076 ± 0                     | 0.073 ± 0.003    | 0.065 ± 0.006     | 0.069 ± 0.003    | 0.034 ± 0.001 | 0.034 ± 0        | 0.071 ± 0     | 0.047 ± 0.001    |
| <b>C18:0</b>         | 0.004 ± 0.006     | 0 ± 0                         | 0 ± 0            | 0.014 ± 0.003     | 0.01 ± 0         | 0.071 ± 0.003 | 0.066 ± 0.002    | 0.006 ± 0.005 | 0.032 ± 0.002    |
| <b>C18:1 (oleat)</b> | 0.092 ± 0.005     | 0.093 ± 0.003                 | 0.093 ± 0.001    | 0.099 ± 0.006     | 0.095 ± 0.001    | 0.164 ± 0.008 | 0.162 ± 0.003    | 0.097 ± 0.001 | 0.133 ± 0.003    |
| <b>C18:3</b>         | 0.004 ± 0.007     | 0.009 ± 0.008                 | 0.008 ± 0.007    | 0.024 ± 0.003     | 0.012 ± 0.003    | 0.016 ± 0     | 0.016 ± 0.001    | 0.019 ± 0.005 | 0.035 ± 0.002    |
| <b>10-Me-C18:0</b>   | 0.26 ± 0.013      | 0.262 ± 0.005                 | 0.265 ± 0.004    | 0.243 ± 0.015     | 0.256 ± 0.008    | 0.125 ± 0.002 | 0.142 ± 0.002    | 0.249 ± 0.006 | 0.2 ± 0.004      |
| <b>Other</b>         | 0.027 ± 0.023     | 0.034 ± 0.018                 | 0.029 ± 0.017    | 0.02 ± 0.007      | 0.028 ± 0.012    | 0.087 ± 0.007 | 0.073 ± 0.003    | 0.06 ± 0.005  | 0.059 ± 0.002    |
| 192 h                |                   |                               |                  |                   |                  |               |                  |               |                  |
|                      | Ammonium chloride | Diammonium hydrogen phosphate | Ammonium sulfate | Potassium nitrate | Ammonium nitrate | Yeast extract | Tryptone/Peptone | Urea          | Ammonium acetate |
| <b>C14:0</b>         | 0.134 ± 0.023     | 0.136 ± 0.005                 | 0.132 ± 0.009    | 0.146 ± 0.019     | 0.134 ± 0.003    | 0.103 ± 0.001 | 0.11 ± 0.005     | 0.138 ± 0.015 | 0.109 ± 0.003    |
| <b>C16:0</b>         | 0.309 ± 0.002     | 0.3 ± 0.007                   | 0.307 ± 0.002    | 0.265 ± 0.004     | 0.279 ± 0.002    | 0.341 ± 0.013 | 0.341 ± 0.008    | 0.301 ± 0.018 | 0.317 ± 0.003    |
| <b>C16:1</b>         | 0.067 ± 0.002     | 0.07 ± 0.004                  | 0.068 ± 0.001    | 0.096 ± 0.005     | 0.096 ± 0.001    | 0.044 ± 0.002 | 0.047 ± 0.001    | 0.072 ± 0.003 | 0.056 ± 0.001    |
| <b>C17:1</b>         | 0.05 ± 0.006      | 0.05 ± 0.001                  | 0.05 ± 0.003     | 0.068 ± 0.003     | 0.063 ± 0.001    | 0.03 ± 0.001  | 0.031 ± 0        | 0.051 ± 0.004 | 0.039 ± 0        |
| <b>C18:0</b>         | 0.027 ± 0.004     | 0.027 ± 0.004                 | 0.028 ± 0.003    | 0.016 ± 0.002     | 0.017 ± 0.001    | 0.08 ± 0.009  | 0.078 ± 0.002    | 0.023 ± 0.006 | 0.051 ± 0.003    |
| <b>C18:1 (oleat)</b> | 0.11 ± 0.011      | 0.118 ± 0.002                 | 0.117 ± 0.006    | 0.107 ± 0.005     | 0.109 ± 0.003    | 0.182 ± 0.014 | 0.18 ± 0.002     | 0.117 ± 0.012 | 0.164 ± 0.006    |
| <b>C18:3</b>         | 0.018 ± 0.003     | 0.026 ± 0.004                 | 0.025 ± 0.004    | 0.025 ± 0.007     | 0.022 ± 0.001    | 0.002 ± 0.001 | 0.007 ± 0.007    | 0.032 ± 0.006 | 0.004 ± 0        |
| <b>10-Me-C18:0</b>   | 0.206 ± 0.013     | 0.203 ± 0.004                 | 0.208 ± 0.003    | 0.239 ± 0.005     | 0.245 ± 0.003    | 0.115 ± 0.001 | 0.122 ± 0.001    | 0.206 ± 0.008 | 0.163 ± 0.005    |
| <b>Other</b>         | 0.078 ± 0.013     | 0.07 ± 0.017                  | 0.065 ± 0.007    | 0.039 ± 0.009     | 0.036 ± 0.004    | 0.104 ± 0.035 | 0.084 ± 0.002    | 0.061 ± 0.003 | 0.095 ± 0.011    |

**Table S7:** Fatty acid profiles of *R. erythropolis* at 140 and 192 h. Samples were cultured with variable carbon sources, n = 3 (except for Maltose-192 h, where n = 2 as one sample was excluded as an outlier). “Other” constitutes fatty acids with a representation below 3% of total fatty acid content (w/w), and include C14:1, C17:0, 14-Methyl-C16:0, C18:3, C20:1, C20:3, C20:5, C22:1 among others.

| 140 h                |               |               |               |               |               |               |               |               |
|----------------------|---------------|---------------|---------------|---------------|---------------|---------------|---------------|---------------|
|                      | Glucose       | Galactose     | Fructose      | Lactose       | Sucrose       | Maltose       | Sorbitol      | Glycerol      |
| <b>C14:0</b>         | 0.137 ± 0.001 | 0.125 ± 0.022 | 0.074 ± 0.002 | 0.089 ± 0.022 | 0.144 ± 0.006 | 0.106 ± 0.013 | 0.123 ± 0     | 0.103 ± 0.004 |
| <b>C15:0</b>         | 0.012 ± 0.003 | 0.009 ± 0.008 | 0.011 ± 0.001 | 0.011 ± 0.01  | 0.011 ± 0.001 | 0 ± 0         | 0.02 ± 0.002  | 0.031 ± 0.003 |
| <b>C16:0</b>         | 0.306 ± 0.01  | 0.304 ± 0.024 | 0.32 ± 0.012  | 0.275 ± 0.01  | 0.307 ± 0.002 | 0.258 ± 0.005 | 0.318 ± 0.001 | 0.326 ± 0.01  |
| <b>C16:1</b>         | 0.068 ± 0.003 | 0.112 ± 0.012 | 0.091 ± 0.001 | 0.128 ± 0.008 | 0.082 ± 0.001 | 0.132 ± 0.002 | 0.074 ± 0     | 0.084 ± 0.023 |
| <b>C17:1</b>         | 0.045 ± 0.003 | 0.059 ± 0.012 | 0.023 ± 0     | 0.062 ± 0.002 | 0.051 ± 0     | 0.088 ± 0.004 | 0.037 ± 0.001 | 0.019 ± 0.002 |
| <b>C18:0</b>         | 0.034 ± 0.004 | 0 ± 0         | 0.048 ± 0.004 | 0 ± 0         | 0.028 ± 0.001 | 0 ± 0         | 0.047 ± 0.001 | 0.044 ± 0.017 |
| <b>C18:1 (oleat)</b> | 0.125 ± 0.002 | 0.051 ± 0.009 | 0.199 ± 0.009 | 0.035 ± 0.003 | 0.084 ± 0.001 | 0.012 ± 0.011 | 0.129 ± 0.002 | 0.181 ± 0.023 |
| <b>10-Me-18:0</b>    | 0.198 ± 0.011 | 0.279 ± 0.028 | 0.143 ± 0.005 | 0.372 ± 0.019 | 0.231 ± 0.003 | 0.378 ± 0.003 | 0.179 ± 0.002 | 0.152 ± 0.037 |
| <b>Other</b>         | 0.075 ± 0     | 0.06 ± 0.042  | 0.091 ± 0.007 | 0.027 ± 0.004 | 0.06 ± 0.001  | 0.026 ± 0.001 | 0.074 ± 0.002 | 0.06 ± 0.013  |

| 192 h                |               |               |               |               |               |               |               |               |
|----------------------|---------------|---------------|---------------|---------------|---------------|---------------|---------------|---------------|
|                      | Glucose       | Galactose     | Fructose      | Lactose       | Sucrose       | Maltose       | Sorbitol      | Glycerol      |
| <b>C14:0</b>         | 0.115 ± 0.004 | 0.131 ± 0.041 | 0.071 ± 0.001 | 0.082 ± 0.01  | 0.142 ± 0.005 | 0.115 ± 0.011 | 0.105 ± 0.001 | 0.103 ± 0.005 |
| <b>C15:0</b>         | 0.019 ± 0.003 | 0.014 ± 0.004 | 0.011 ± 0     | 0.017 ± 0.002 | 0.012 ± 0     | 0.006 ± 0.008 | 0.024 ± 0.002 | 0.031 ± 0.004 |
| <b>C16:0</b>         | 0.32 ± 0.009  | 0.353 ± 0.026 | 0.326 ± 0.007 | 0.277 ± 0.014 | 0.304 ± 0.004 | 0.241 ± 0.005 | 0.311 ± 0.002 | 0.33 ± 0.007  |
| <b>C16:1</b>         | 0.055 ± 0.002 | 0.096 ± 0.041 | 0.089 ± 0.01  | 0.126 ± 0.001 | 0.081 ± 0.001 | 0.123 ± 0.013 | 0.077 ± 0.001 | 0.063 ± 0.009 |
| <b>C17:1</b>         | 0.037 ± 0.001 | 0.047 ± 0.012 | 0.023 ± 0.001 | 0.064 ± 0.005 | 0.055 ± 0     | 0.093 ± 0.007 | 0.041 ± 0     | 0.019 ± 0.002 |
| <b>C18:0</b>         | 0.053 ± 0.003 | 0.022 ± 0.038 | 0.045 ± 0.002 | 0 ± 0         | 0.033 ± 0.003 | 0.007 ± 0.01  | 0.05 ± 0.002  | 0.052 ± 0.008 |
| <b>C18:1 (oleat)</b> | 0.151 ± 0.006 | 0.078 ± 0.066 | 0.209 ± 0.004 | 0.031 ± 0.006 | 0.08 ± 0.001  | 0.03 ± 0.029  | 0.131 ± 0.002 | 0.206 ± 0.023 |
| <b>10-Me-18:0</b>    | 0.157 ± 0.011 | 0.219 ± 0.042 | 0.142 ± 0.001 | 0.381 ± 0.015 | 0.222 ± 0     | 0.332 ± 0.068 | 0.178 ± 0.002 | 0.119 ± 0.016 |
| <b>Other</b>         | 0.092 ± 0.027 | 0.04 ± 0.01   | 0.084 ± 0.009 | 0.022 ± 0.014 | 0.072 ± 0.002 | 0.052 ± 0.074 | 0.084 ± 0.002 | 0.077 ± 0.003 |

Table S8: ANOVA of central composite design (CCD) models after 192 h.

| Biomass 192 h             |                |    |                                |         |          |                 |
|---------------------------|----------------|----|--------------------------------|---------|----------|-----------------|
| Source                    | Sum of Squares | df | Mean Square                    | F-value | p-value  |                 |
| <b>Model</b>              | 84.07          | 3  | 28.02                          | 131.83  | < 0.0001 | significant     |
| A-Carbon                  | 5.55           | 1  | 5.55                           | 26.13   | 0.0001   |                 |
| B-Nitrogen                | 75.75          | 1  | 75.75                          | 356.38  | < 0.0001 |                 |
| AB                        | 2.76           | 1  | 2.76                           | 12.99   | 0.0024   |                 |
| <b>Residual</b>           | 3.4            | 16 | 0.2126                         |         |          |                 |
| Lack of Fit               | 1.9            | 5  | 0.3806                         | 2.79    | 0.0722   | not significant |
| Pure Error                | 1.5            | 11 | 0.1362                         |         |          |                 |
| <b>Cor Total</b>          | 87.47          | 19 |                                |         |          |                 |
| <b>Std. Dev.</b>          | 0.4611         |    | <b>R<sup>2</sup></b>           | 0.9611  |          |                 |
| <b>Mean</b>               | 4.25           |    | <b>Adjusted R<sup>2</sup></b>  | 0.9538  |          |                 |
| <b>C.V. %</b>             | 10.85          |    | <b>Predicted R<sup>2</sup></b> | 0.9416  |          |                 |
|                           |                |    | <b>Adeq Precision</b>          | 33.0434 |          |                 |
| Lipid content 192 h       |                |    |                                |         |          |                 |
| Source                    | Sum of Squares | df | Mean Square                    | F-value | p-value  |                 |
| <b>Model</b>              | 6333.18        | 3  | 2111.06                        | 36.5    | < 0.0001 | significant     |
| A-Carbon                  | 357.83         | 1  | 357.83                         | 6.19    | 0.0243   |                 |
| B-Nitrogen                | 4889.89        | 1  | 4889.89                        | 84.54   | < 0.0001 |                 |
| B <sup>2</sup>            | 1879.87        | 1  | 1879.87                        | 32.5    | < 0.0001 |                 |
| <b>Residual</b>           | 925.42         | 16 | 57.84                          |         |          |                 |
| Lack of Fit               | 889.71         | 5  | 177.94                         | 54.82   | < 0.0001 | significant     |
| Pure Error                | 35.71          | 11 | 3.25                           |         |          |                 |
| <b>Cor Total</b>          | 7258.59        | 19 |                                |         |          |                 |
| <b>Std. Dev.</b>          | 7.61           |    | <b>R<sup>2</sup></b>           | 0.8725  |          |                 |
| <b>Mean</b>               | 36.13          |    | <b>Adjusted R<sup>2</sup></b>  | 0.8486  |          |                 |
| <b>C.V. %</b>             | 21.05          |    | <b>Predicted R<sup>2</sup></b> | 0.7262  |          |                 |
|                           |                |    | <b>Adeq Precision</b>          | 18.9127 |          |                 |
| Carotenoide content 192 h |                |    |                                |         |          |                 |
| Source                    | Sum of Squares | df | Mean Square                    | F-value | p-value  |                 |
| <b>Model</b>              | 0.0001         | 3  | 0                              | 20.51   | < 0.0001 | significant     |
| A-Carbon                  | 0              | 1  | 0                              | 15.74   | 0.0011   |                 |
| B-Nitrogen                | 0              | 1  | 0                              | 41.87   | < 0.0001 |                 |
| B <sup>2</sup>            | 9.94E-06       | 1  | 9.94E-06                       | 8.72    | 0.0094   |                 |
| <b>Residual</b>           | 0              | 16 | 1.14E-06                       |         |          |                 |
| Lack of Fit               | 7.55E-06       | 5  | 1.51E-06                       | 1.55    | 0.2525   | not significant |
| Pure Error                | 0              | 11 | 9.73E-07                       |         |          |                 |
| <b>Cor Total</b>          | 0.0001         | 19 |                                |         |          |                 |
| <b>Std. Dev.</b>          | 0.0011         |    | <b>R<sup>2</sup></b>           | 0.7936  |          |                 |
| <b>Mean</b>               | 0.0173         |    | <b>Adjusted R<sup>2</sup></b>  | 0.7549  |          |                 |
| <b>C.V. %</b>             | 6.17           |    | <b>Predicted R<sup>2</sup></b> | 0.6715  |          |                 |
|                           |                |    | <b>Adeq Precision</b>          | 13.7974 |          |                 |
